# Supplementary material for: Glycolipid-based nanostructures with thermal-phase transition behavior functioning as solubilizers and refolding accelerators for protein aggregates
Source: Royal Society of Chemistry journal article supplement (doi:10.1039/c7sm00310b), 2017-01-01
Supplement: c7sm00310b1.pdf [file c7sm00310b1.pdf]

## **Electronic Supplemental Information (ESI)**

### **Title**

Glycolipid-based Nanostructures with Thermal-Phase Transition Behavior Functioning as Solubilizers and Refolding Accelerators for Protein Aggregates

### **Authors**

N. Kameta,\* T. Matsuzawa, K. Yaoi, J. Fukuda and M. Masuda

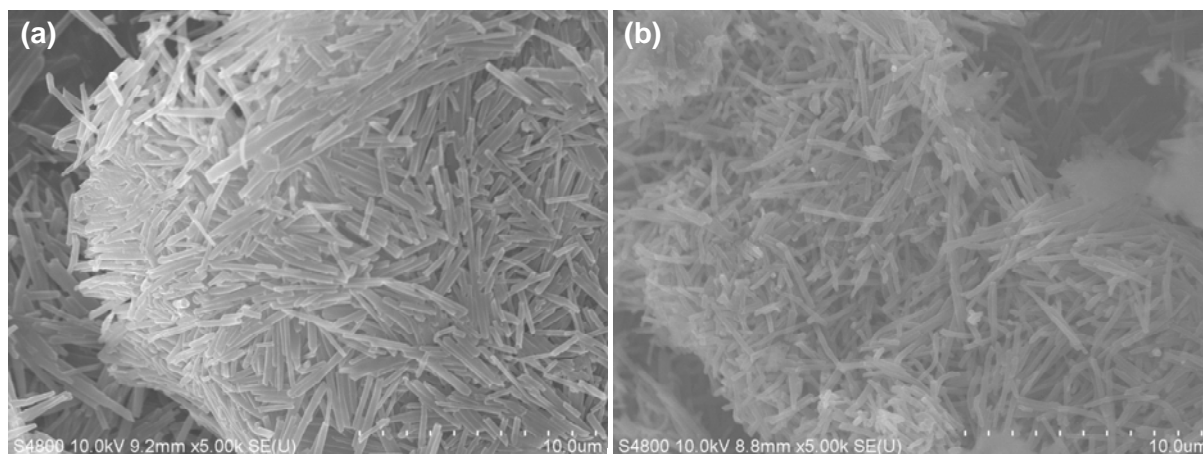

**Fig. S1** SEM images of (a) 2,3-nanotubes and (b) 2,4-nanotubes after dispersion them in phosphate-buffered saline at pH 7.4 for one month.

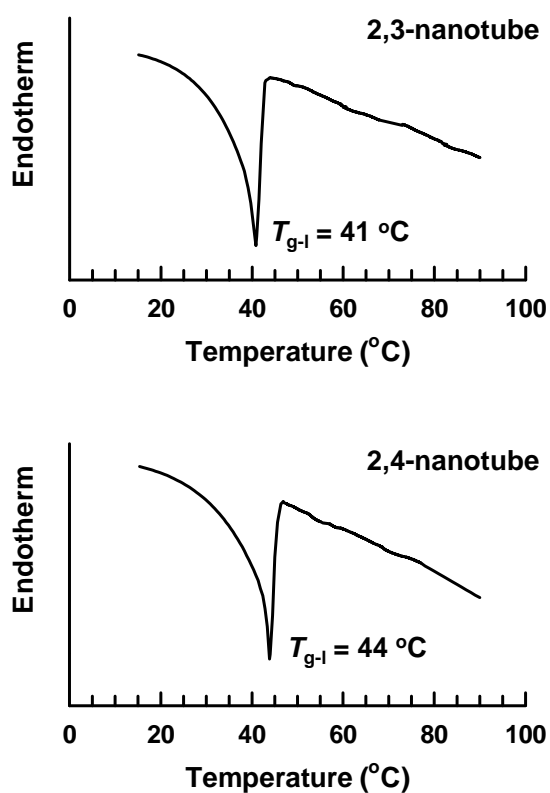

**Fig. S2** DSC profiles of the 2,3-nanotube (2 : 3 = 90% : 10%) and the 2,4-nanotube (2 : 4 = 90% : 10%).

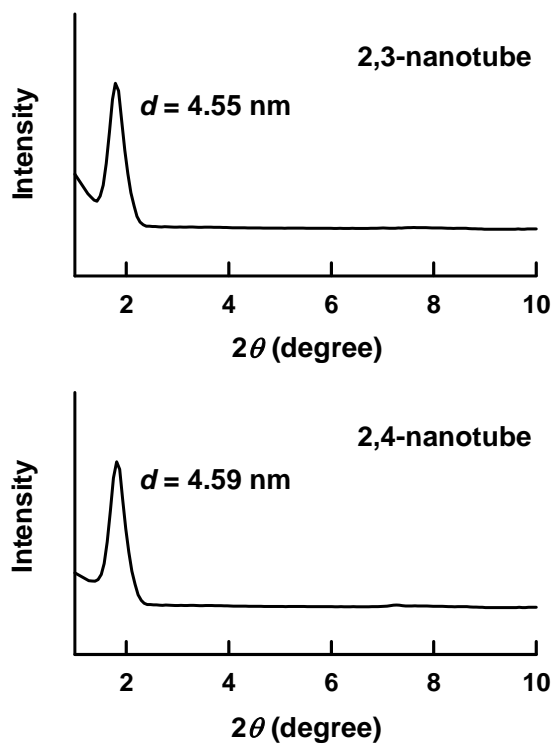

**Fig. S3** XRD patterns of the 2,3-nanotube ( $2 : 3 = 90\% : 10\%$ ) and the 2,4-nanotube ( $2 : 4 = 90\% : 10\%$ ).

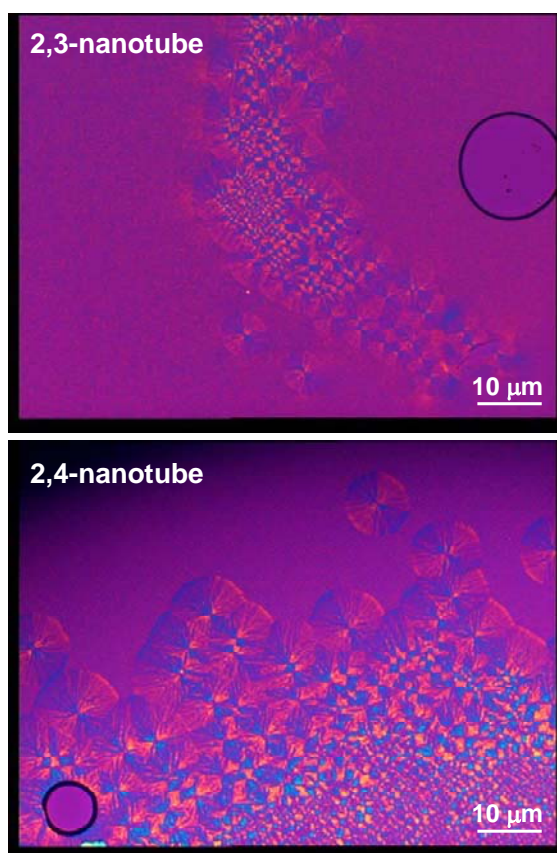

**Fig. S4** Polarized microscopic images of the 2,3-nanotube ( $2 : 3 = 90\% : 10\%$ ) and the 2,4-nanotube ( $2 : 4 = 90\% : 10\%$ ) at  $60\ ^\circ\text{C}$ .

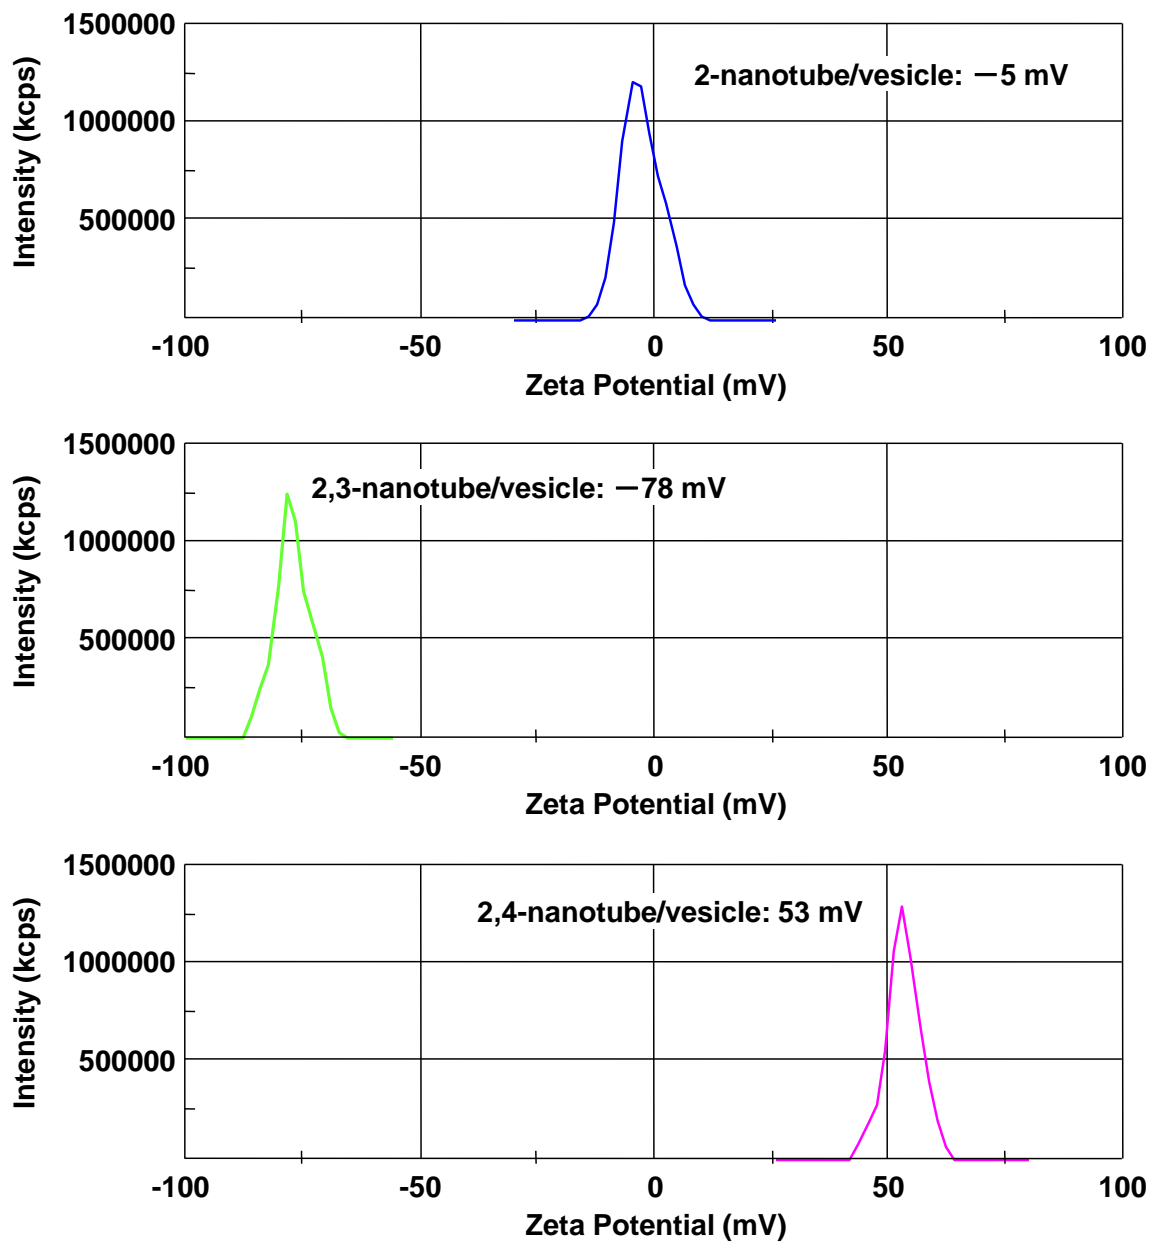

**Fig. S5** Zeta potential distributions of the aqueous dispersions of the nanotubes/vesicles under neutral pH conditions.
